# Supplementary material for: One-pot facile synthesis of PDMS/PDMAEMA hybrid sponges for surfactant stabilized O/W emulsion separation
Source: Royal Society of Chemistry journal article supplement (doi:10.1039/d1sm01061a), 2021-01-01
Supplement: d1sm01061a1.pdf [file d1sm01061a1.pdf]

## Supporting Information

**One-pot facile synthesis of PDMS/PDMAEMA hybrid sponges for surfactant stabilized**

**O/W emulsion separation**

Haifeng Liu<sup>a, b, c</sup>, Yifeng Sun<sup>a</sup>, Zhonghui Chen<sup>a, d\*</sup>

<sup>a</sup> Guangdong Provincial Key Laboratory of Emergency Test for Dangerous Chemicals, Institute of Analysis, Guangdong Academy of Sciences (China National Analytical Center, Guangzhou), Guangzhou 510070, China; <sup>b</sup> Yinchuan Zhongke Yuanhao Technology Co., Ltd., Yinchuan 750011, China; <sup>c</sup> School of Chemistry, Sun Yat-sen University, Guangzhou 510275, China.

\*Corresponding author, E-mail address: [Chen\\_Zhonghui414@163.com](mailto:Chen_Zhonghui414@163.com)

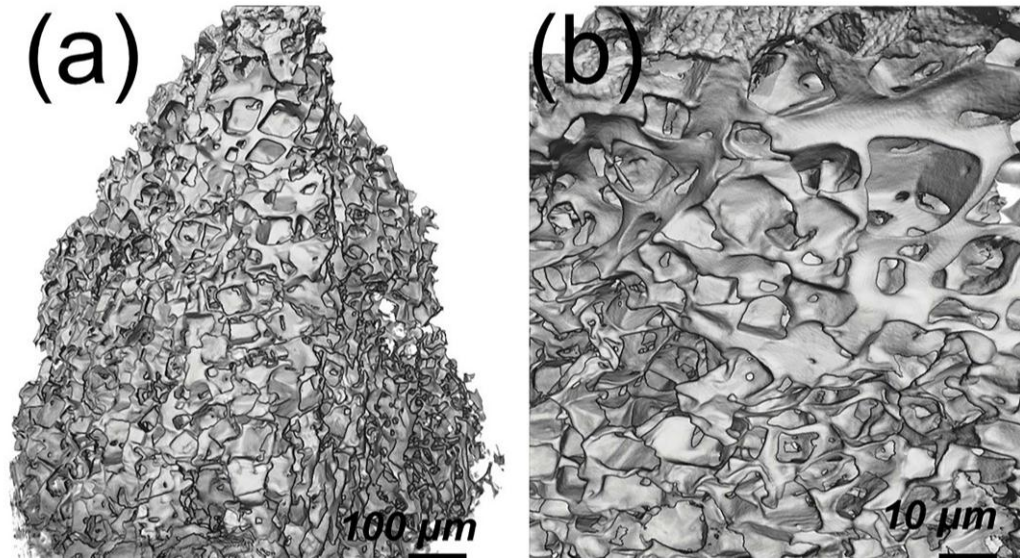

**Fig. S1.** 3D images of PDMS sponges, taken on a 3D X-ray microscope (Nanovoxel-2100, Sanying Precision Engineering Research Center, China).

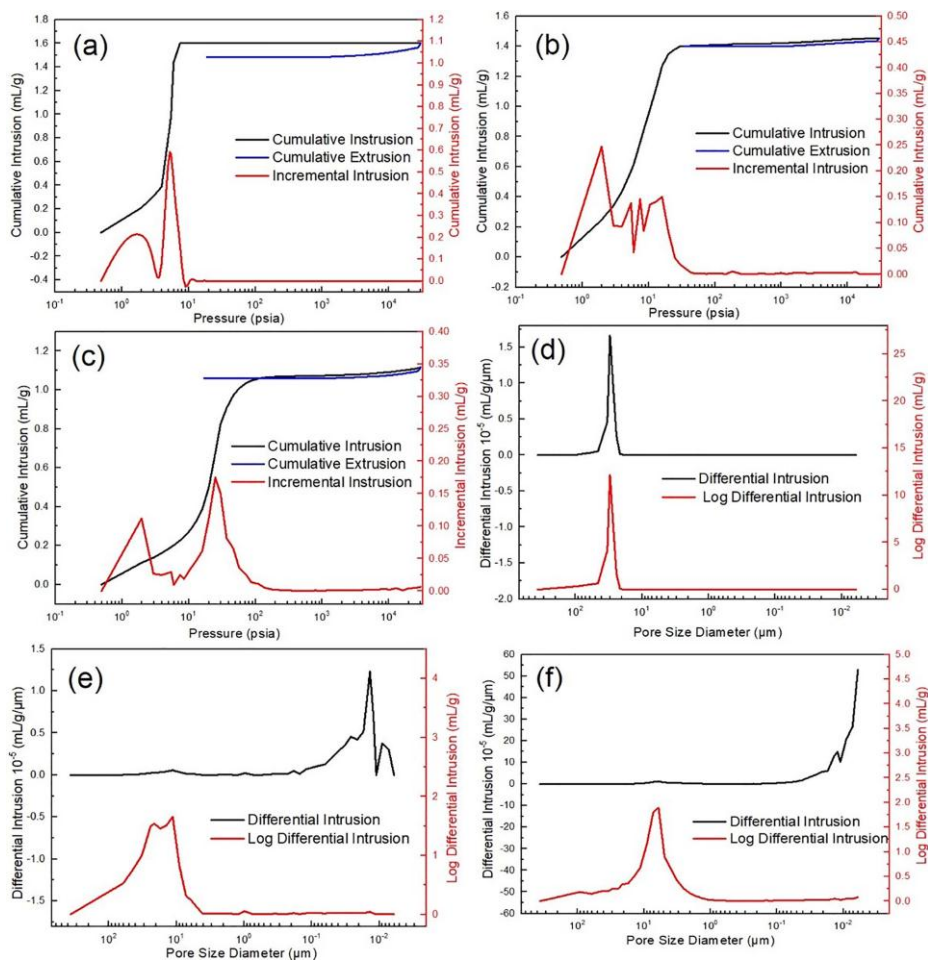

**Fig. S2** (a-c) Mercury intrusion curves as a function of pressure of the PDMS, PDMS-MWCNTs<sub>1.0%</sub> and HBNWS<sub>40%</sub>; (d-f) Pore size distributions of the PDMS, PDMS-MWCNTs<sub>1.0%</sub> and HBNWS<sub>40%</sub>.

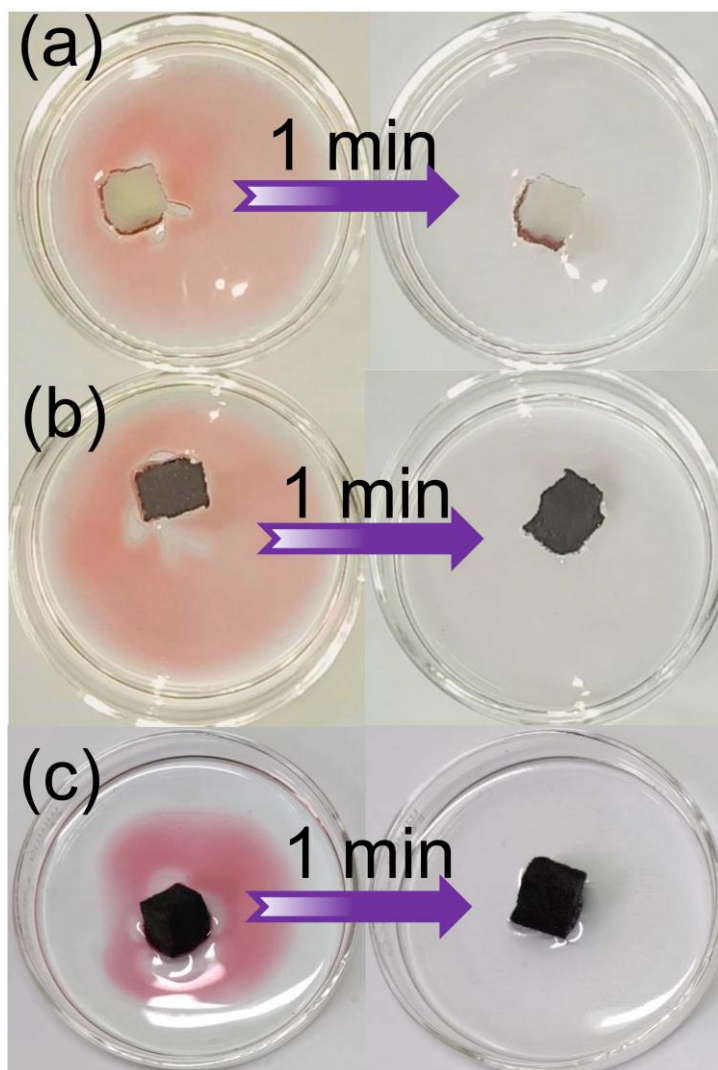

Fig. S3 (a-c) Oil/water mixture separation performance of PDMS, PDMS-MWCNTs<sub>1.0%</sub> and HBNWs<sub>50%</sub>.

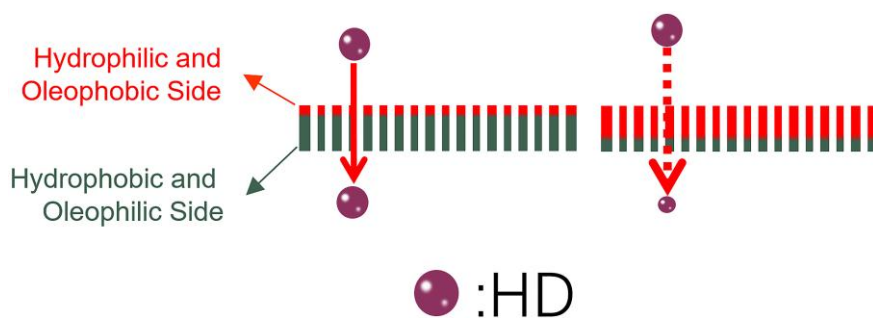

Fig. S4 Schematic illustration of Janus interface (in water environment)

For Janus interface, generally speaking, when lyophilic side is thin, liquid droplet can go through. If the lyophilic side is too thick, liquid droplet cannot go through or much slower. This phenomenon was affected by liquid surfaces tension and evaporation pressure, pore diameter of interface, interface surface tension and roughness, etc<sup>1-3</sup>.

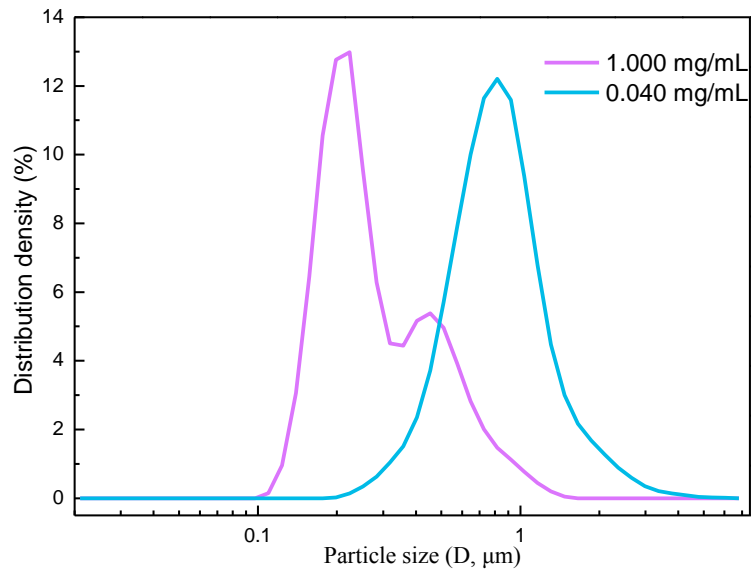

**Fig. S5.** Effect of surfactant concentration on emulsion particle size distribution

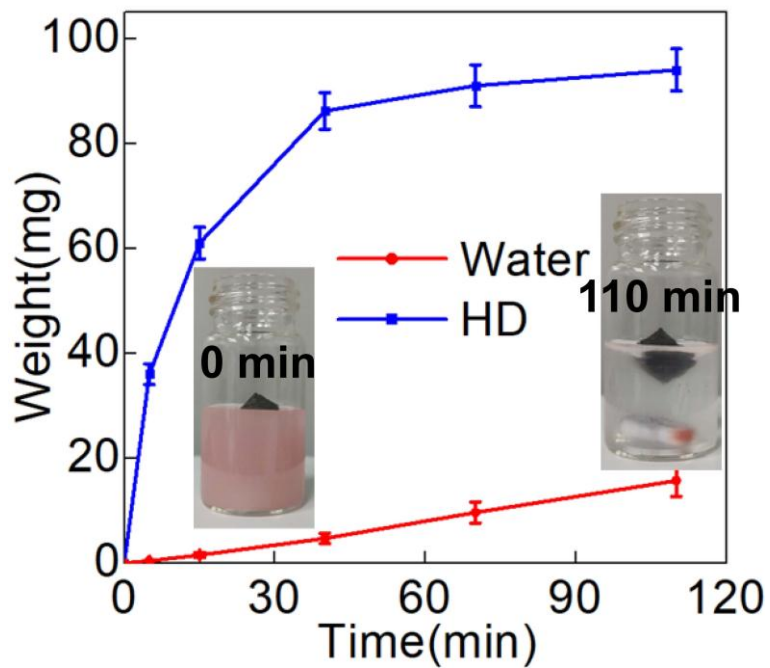

**Fig. S6.** Oil recovery performance of HBNWs<sub>40%</sub> on low oil content emulsion

### References

1. H. Yang, Y. Xie, et al., *Advanced Materials*, 2018, 1801495.
2. H. Wang, W. Wang, et al., *Applied Surface Science*, 2018, 455,924-930.
3. C. Zeng, H. Wang, H. Zhou and T. Lin, *Advanced Materials Interfaces*, 2016, 1600036.
